# Supplementary material for: Human coronavirus OC43-elicited CD4+ T cells protect against SARS-CoV-2 in HLA transgenic mice
Source: PubMed Central journal article supplement (PMC10817949; doi:10.1038/s41467-024-45043-2), 2024-01-26
Supplement: 41467_2024_45043_MOESM1_ESM.pdf [file 41467_2024_45043_MOESM1_ESM.pdf]

## Human coronavirus OC43-elicited CD4<sup>+</sup> T cells protect against SARS-CoV-2 in HLA transgenic mice

Rúbens Prince dos Santos Alves<sup>1</sup>, Julia Timis<sup>1</sup>, Robyn Miller<sup>1</sup>, Kristen Valentine<sup>1</sup>, Paolla Beatriz Almeida Pinto<sup>1</sup>, Andrew Gonzalez<sup>1</sup>, Jose Angel Regla-Nava<sup>1,†</sup>, Erin Maule<sup>1</sup>, Michael N Nguyen<sup>1</sup>, Norazizah Shafee<sup>1</sup>, Sara Landeras Bueno<sup>1</sup>, Eduardo Olmedillas<sup>1</sup>, Brett Laffey<sup>2</sup>, Katarzyna Dobaczewska<sup>2</sup>, Zbigniew Mikulski<sup>2</sup>, Sara McArdle<sup>2</sup>, Sarah R Leist<sup>3</sup>, Kenneth Kim<sup>4</sup>, Ralph S Baric<sup>3,5</sup>, Erica Ollmann Saphire<sup>1,6</sup>, Annie Elong Ngono<sup>1\*</sup>, Sujan Shresta<sup>1\*</sup>

<sup>1</sup>Center for Infectious Disease and Vaccine Research, La Jolla Institute for Immunology, La Jolla, CA, USA

<sup>2</sup>Microscopy and Histology Core Facility, La Jolla Institute for Immunology, La Jolla, CA, USA

<sup>3</sup>Department of Epidemiology, University of North Carolina at Chapel Hill, Chapel Hill, NC, USA

<sup>4</sup>Histopathology Core Facility, La Jolla Institute for Immunology, La Jolla, CA, USA

<sup>5</sup>Department of Microbiology and Immunology, University of North Carolina at Chapel Hill, Chapel Hill, NC, USA

<sup>6</sup>Department of Medicine, Division of Infectious Diseases and Global Public Health, University of California, San Diego (UCSD), La Jolla, CA, USA

<sup>†</sup> Current address: Department of Microbiology and Pathology, University Center for Health Science (CUCS), University of Guadalajara, Guadalajara 44340, Mexico

\*Corresponding authors: Sujan Shresta ([sujan@lji.org](mailto:sujan@lji.org)) and Annie Elong Ngono ([aelong@lji.org](mailto:aelong@lji.org))

TABLES

| <b>Table S1. Whole-genome sequence homology between SARS-CoV-2 (MT786327) and the 6 other HCoVs<sup>35</sup>.</b> |                                |                                |                            |                            |                            |                            |
|-------------------------------------------------------------------------------------------------------------------|--------------------------------|--------------------------------|----------------------------|----------------------------|----------------------------|----------------------------|
|                                                                                                                   | <b>SARS-CoV</b><br>(NC_004718) | <b>MERS-CoV</b><br>(NC_019843) | <b>OC43</b><br>(NC_006213) | <b>HKU1</b><br>(NC_006577) | <b>NL63</b><br>(NC_005831) | <b>229E</b><br>(NC_002645) |
| <b>SARS-CoV-2</b>                                                                                                 | 86.85                          | 81.25                          | 79.34                      | 81.58                      | 80.09                      | 78.40                      |

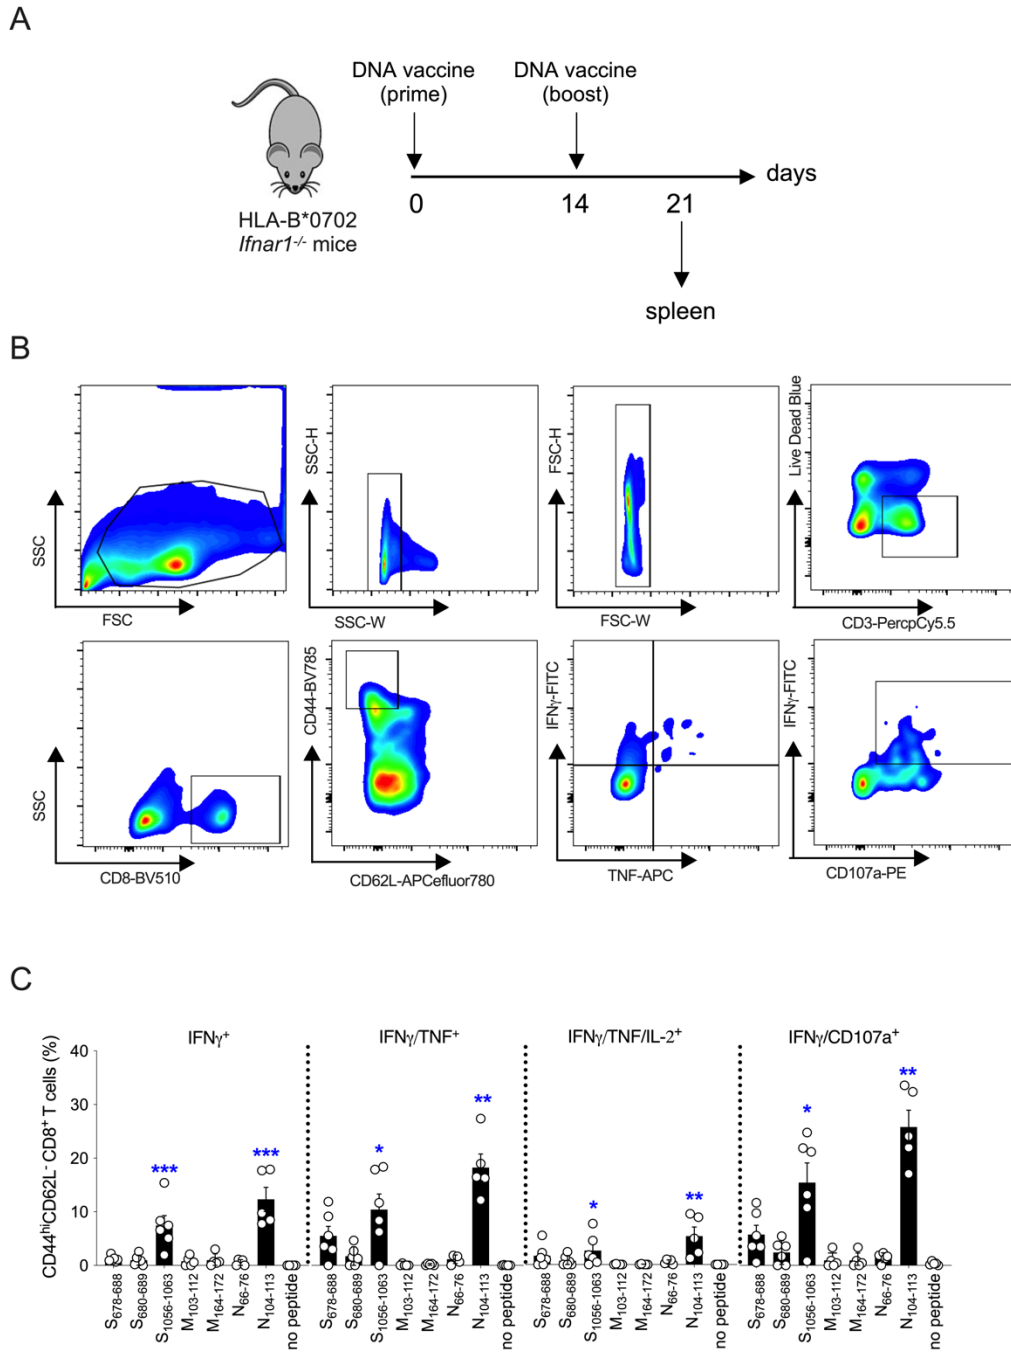

**Figure S1 (related to Figure 1). Validation of SARS-CoV-2 S, N, and M protein-derived epitopes in vaccinated HLA-B\*0702 *Ifnar1*<sup>-/-</sup> mice**

**(A)** Experimental protocol. HLA-B\*0702 *Ifnar1*<sup>-/-</sup> mice were injected with 25  $\mu$ g S-, N-, or M-based DNA vaccine (vs saline) via intramuscular electroporation on days 0 and 14 and spleens collected 7 days later.

**(B)** Gating strategy used to analyze activated ( $CD44^+ CD62L^-$ )  $CD8^+$  T cells producing cytokines ( $IFN\gamma$ , TNF, IL-2) and a degranulation marker (CD107a) after stimulation of splenocytes with SARS-CoV-2-derived peptides. Cells producing  $IFN\gamma^+/TNF^+/IL-2^+$  were identified from the  $IFN\gamma^+/TNF^+$  population using a Boolean algorithm.

**(C)** ICS analysis of activated  $CD8^+$  T cells in splenocytes stimulated for 6 h with 1 of 7 SARS-CoV-2 S, M, or N protein-derived peptides (vs no peptide), immunolabeled for cell surface markers, cytokines, and CD107a, and analyzed by flow cytometry. Data are presented as the mean  $\pm$  SEM. Circles, individual mice; N=5-6 mice/group pooled from 2 independent experiments. Peptide vs control were compared using the Kruskal-Wallis test. \*,  $P < .05$ ; \*\*,  $P < .01$ ; \*\*\*,  $P < .001$ .

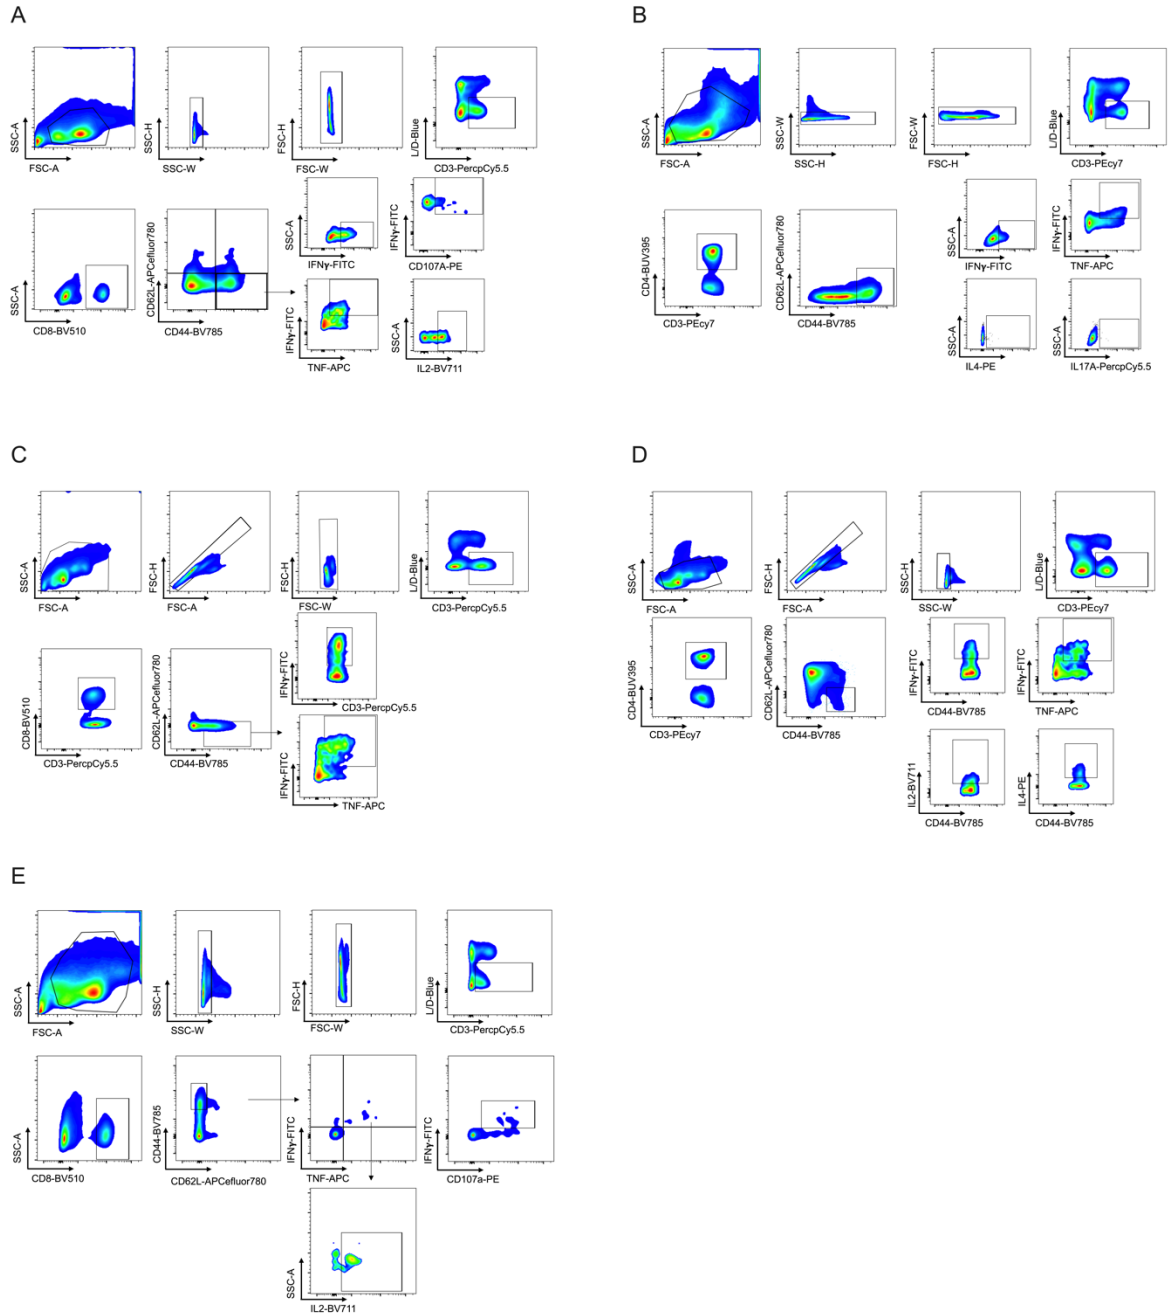

**Figure S2 (related to Figures 2, 3, 4, and 5). Gating strategies used to analyze T cell responses.**

The lymphocyte gate was selected based on size and granularity (FSC and SSC), and double events were excluded using SSC/ FSC height and width. Lymphocytes were selected first for viable CD3<sup>+</sup> cells, second for CD8<sup>+</sup> or CD4<sup>+</sup> subset, and finally for effector memory cells (CD44<sup>+</sup>CD62L<sup>-</sup>). In the effector memory population, polyfunctional T cells were examined for

expression of different cytokines (IFN $\gamma$ , TNF, IL-2, IL-4, IL-17A) and degranulation marker (CD107a). For each sample, no less than 50,000 events were acquired within the region of viable CD3<sup>+</sup> lymphocytes.

**A**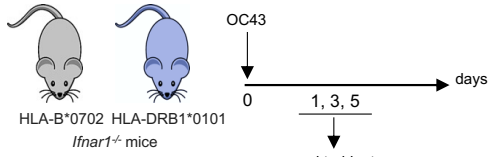**B**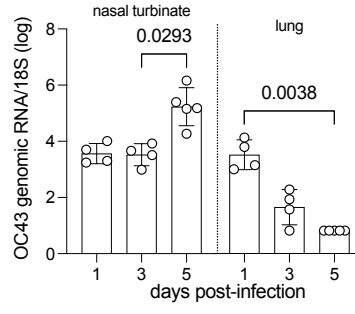**C**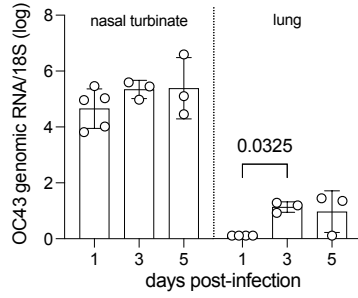**D**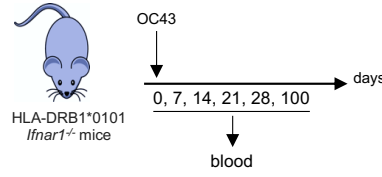**E**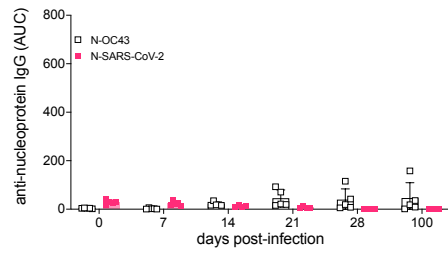**F**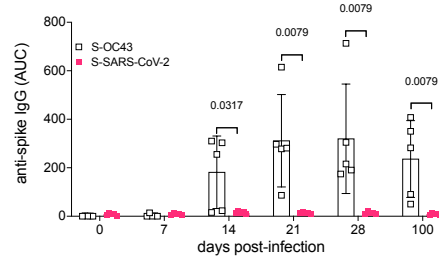**G**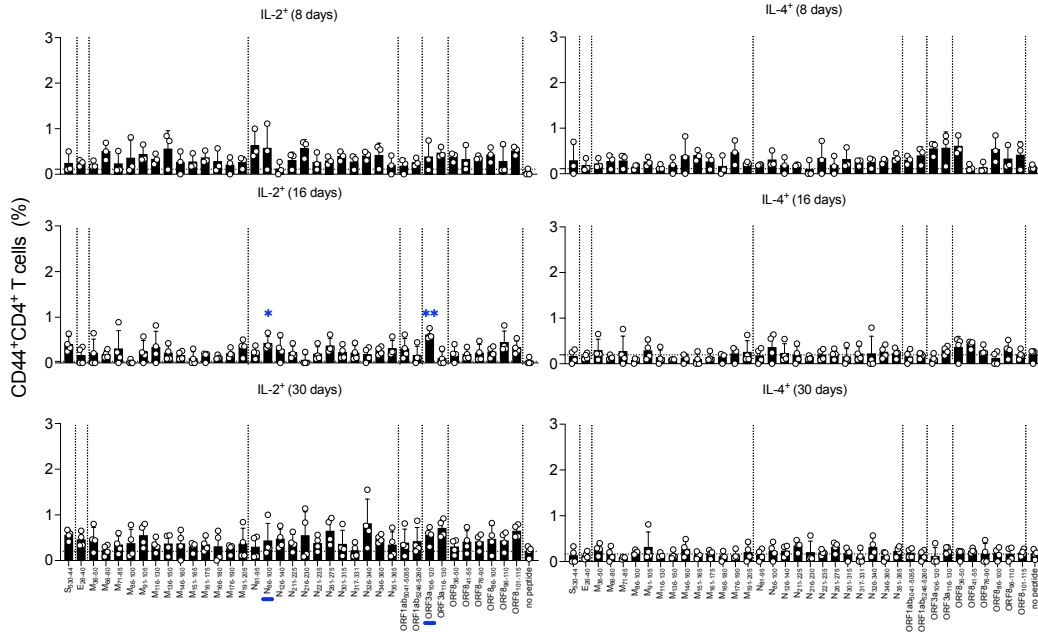

**Figure S3 (related to Figures 3 and 4). OC43 infection in mice.**

**(A)** Experimental protocol for B and C. HLA-B\*0702 and HLA-DRB1\*0101 *Ifnar1*<sup>-/-</sup> mice were infected with OC43 (10<sup>9</sup> GE, IN) and nasal turbinates and lungs collected on days 1, 3, and 5 post-infection.

**(B and C)** RT-qPCR analysis of genomic OC43 RNA in tissues of HLA-B\*0702 *Ifnar1*<sup>-/-</sup> (B) and HLA-DRB1\*01010 *Ifnar1*<sup>-/-</sup> (C) mice. N=3-5 mice/group. Data were compared using the nonparametric Kruskal-Wallis test.

**(D)** Experimental protocol for E and F. HLA-DRB1\*0101 *Ifnar1*<sup>-/-</sup> mice were infected with OC43 (10<sup>9</sup> GE, IN), and blood samples were collected immediately prior to infection, and at 5 time points post-infection.

**(E and F)** ELISA analysis of IgG against S protein (E) and N protein (F) of OC43 and SARS-CoV-2. N=4-5 mice/group. IgG levels against antigens from SARS-CoV-2 vs OC43 at each time point were compared using the nonparametric Mann-Whitney test.

**(G)** ICS analysis of activated CD4<sup>+</sup> T cells. HLA-DRB1\*0101 *Ifnar1*<sup>-/-</sup> mice were infected with OC43 (10<sup>9</sup> GE, IN), and spleens were collected on day 8 (N=3), 16 (N=4), or 30 (N=4) post-infection. Splenocytes were stimulated for 6 h with 37 SARS-CoV-2 peptides (Table 5) vs no peptide, immunolabeled for cell surface markers and intracellular cytokines, and analyzed by flow cytometry. Peptide vs control data were compared using the nonparametric Kruskal-Wallis test. Blue bars on the x-axis, peptides that significantly stimulated cells at 1 or more time points.

**(B,C,E-G)** Data, pooled from 2 independent experiments, are presented as the mean ± SEM. \*,  $P < .05$ ; \*\*,  $P < .01$ . Circles, individual mice.



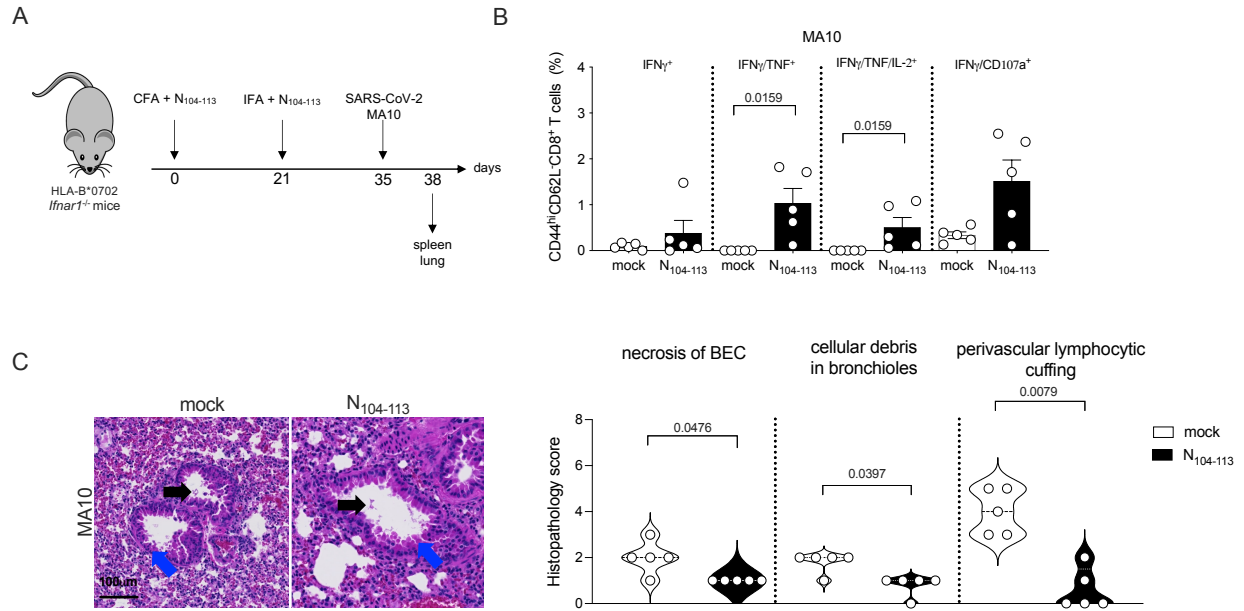

**Figure S4 (related to Figure 5). SARS-CoV-2 N<sub>104-113</sub> immunization is protective against SARS-CoV-2-induced lung disease in HLA-B\*0702 *Ifnar1*<sup>-/-</sup> mice challenged with SARS-CoV-2 MA10.**

**(A)** Experimental protocol for B and C. HLA-B\*0702 *Ifnar1*<sup>-/-</sup> mice were injected with SARS-CoV-2 N<sub>104-113</sub> vs DMSO (mock) on days 0 (complete Freund's adjuvant, CFA) and 21 (incomplete Freund's adjuvant, IFA); 2 weeks later, mice were challenged with SARS-CoV-2 MA10 (10<sup>5</sup> PFU, IN) and tissues collected 3 days later.

**(B)** ICS analysis of activated CD8<sup>+</sup> T cells. Splenocytes were stimulated for 6 h with SARS-CoV-2 N<sub>104-113</sub> peptide, immunolabeled for cell surface markers, intracellular cytokines, and CD107a, and analyzed by flow cytometry.

**(C)** Representative H&E-stained sections of lungs. Blue arrows, bronchiolar epithelial cells (BEC); black arrows, epithelial cells in bronchioles. Sections were scored from 0 (least severe) to 5 (most severe) for standard histopathological features of SARS-CoV-2-induced lung disease.

**(B,C)** Data, pooled from 2 independent experiments, are presented as the mean ± SEM. Circles, individual mice; N=5 mice/group. Groups were compared by the Mann–Whitney test.

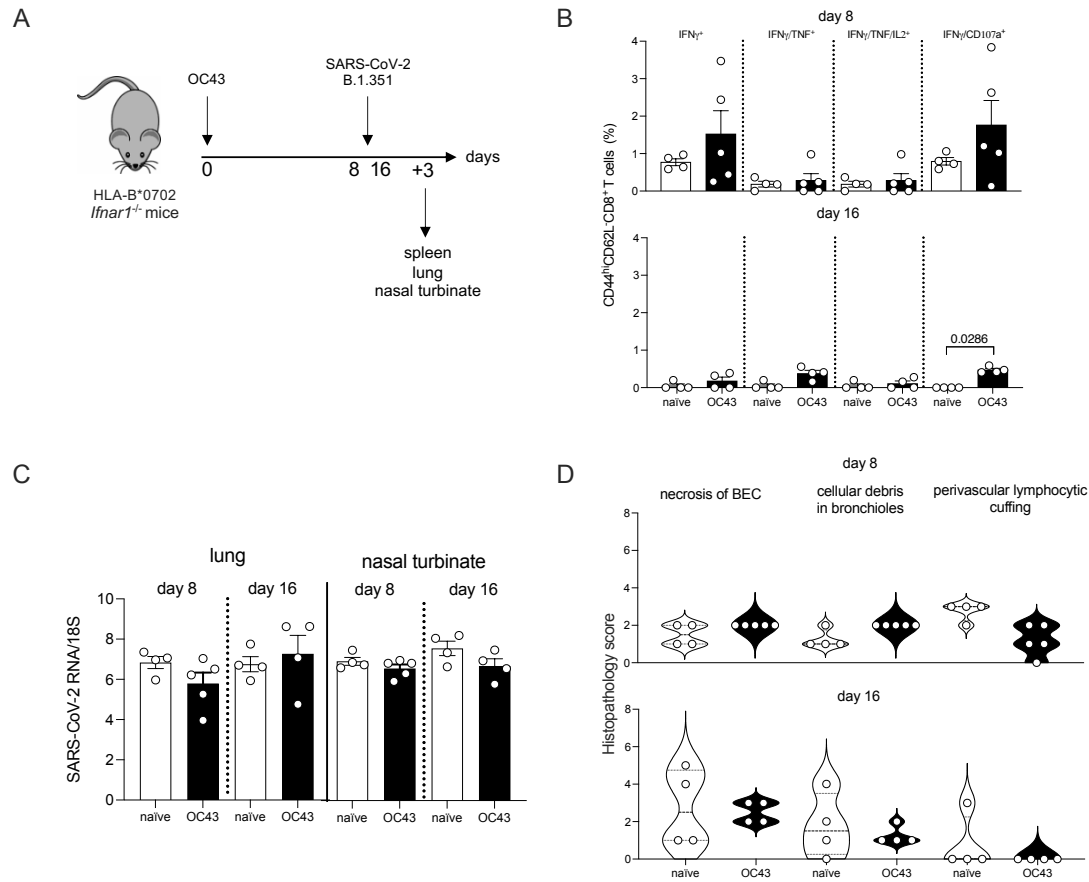

**Figure S5 (related to Figure 5). SARS-CoV-2 RNA load and lung pathology of OC43-infected HLA-B\*0702 *Ifnar1*<sup>-/-</sup> mice challenged with SARS-CoV-2 B.1.351.**

**(A)** Experimental protocol. Mice were infected with OC43 ( $10^9$  GE, IN) vs medium (naïve), challenged with SARS-CoV-2 B.1.351 ( $10^5$  PFU, IN) 8 or 16 days later, and tissues were harvested at 3 days post-challenge.

**(B)** RT-qPCR of genomic OC43 RNA.

**(C)** H&E-stained lung sections were scored from 0 (least severe) to 5 (most severe) for standard histopathological features of SARS-CoV-2-induced lung disease.

**(D)** ICS analysis of OC43-elicited activated CD8<sup>+</sup> T cells. Splenocytes were stimulated for 6 h with SARS-CoV-2 N<sub>104-113</sub> peptide, immunolabeled for cell surface markers, intracellular cytokines, and CD107a, and analyzed by flow cytometry.

**(B-D)** Data, pooled from 2 independent experiments, are presented as the mean  $\pm$  SEM. Circles, individual mice; n=4-5 mice/group. Groups were compared using the Mann–Whitney test.

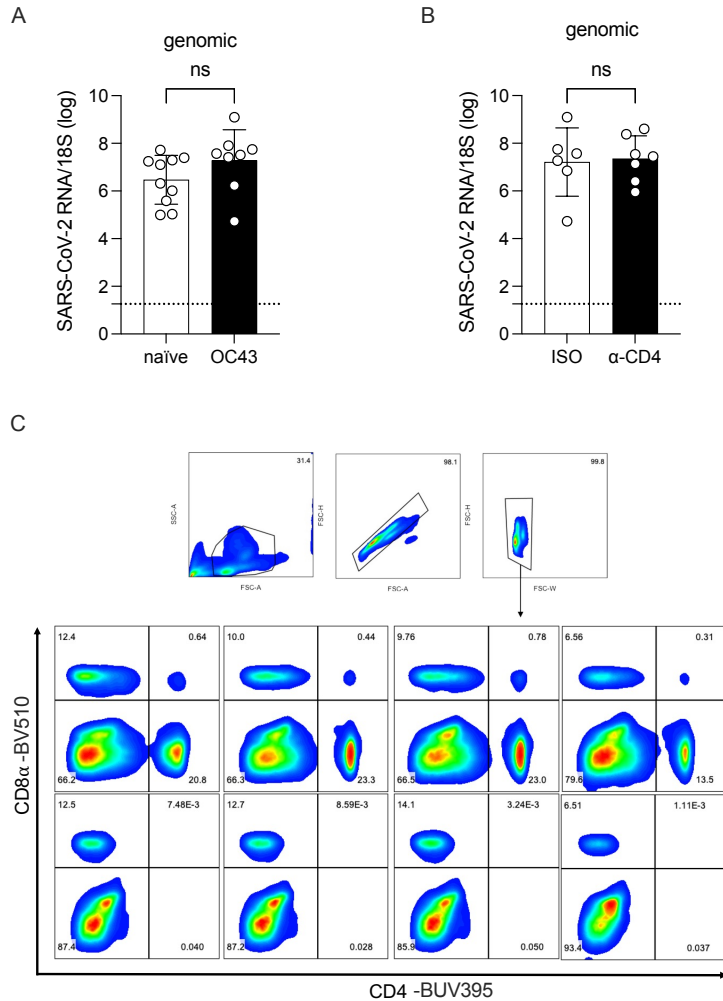

**Figure S6 (related to Figure 6). SARS-CoV-2 challenge of HLA-DRB1\*0101 *Ifnar1*<sup>-/-</sup> mice pre-exposed to OC43.**

Experimental protocols are described in Figures 6A (A) and 6E (B,C).

**(A,B)** RT-qPCR of SARS-CoV-2 genomic RNA in nasal turbinates. Data are presented as the mean ± SEM. Circles, individual mice. Mice/group: A, 8 (OC43-infected) and 10 (naïve); B, 6-7. Group differences were analyzed by the Mann–Whitney test. Horizontal dotted line, the limit of detection.

**(C)** Gating strategy used to analyze CD4<sup>+</sup> T cells in the blood of mice treated with a CD4<sup>+</sup> T cell-depleting antibody (α-CD4) vs isotype control. Each dot plot represents a mouse.
